# Supplementary material for: The ancient Chinese civilization left remarkable signals in the marine environment since the Bronze Age
Source: Research Square preprint supplement (doi:10.21203/rs.3.rs-143207/v1), 2021-01-11
Supplement: Supplementary file 2 [file cbbfe68b61c316ab3aae6e19.xlsx]

## Sheet: Sheet1
Depth(cm)	char(mg/g)	soot(mg/g)	BC(mg/g)
0.5	2.47297	0.193544	2.66651
1.5	2.12515	0.219286	2.34443
2.5	2.10562	0.1483	2.25392
3.5	2.42713	0.173881	2.60101
4.5	2.37046	0.232259	2.60272
5.5	2.07695	0.146032	2.22298
6.5	2.2427	0.16482	2.40752
7.5	2.45227	0.188134	2.6404
8.5	2.06526	0.173526	2.23879
9.5	2.37156	0.234444	2.60601
10.5	2.76042	0.213511	2.97393
11.5	2.65311	0.174106	2.82721
12.5	2.42584	0.160324	2.58617
13.5	2.583	0.192815	2.77582
14.5	2.65713	0.19995	2.85708
15.5	2.27742	0.157671	2.43509
16.5	2.53944	0.14322	2.68266
17.5	2.71794	0.166742	2.88468
18.5	2.73389	0.220251	2.95414
19.5	2.52649	0.243001	2.76949
20.5	2.86512	0.220735	3.08586
21.5	2.20969	0.153917	2.3636
22.5	2.38735	0.224345	2.6117
23.5	2.67259	0.159789	2.83238
24.5	2.19012	0.147378	2.3375
25.5	1.97387	0.169201	2.14308
26.5	2.38687	0.18944	2.57631
27.5	2.34327	0.20754	2.55081
28.5	2.15008	0.145077	2.29516
29.5	2.37984	0.204232	2.58407
30.5	2.37093	0.15851	2.52944
31.5	2.4112	0.164172	2.57537
32.5	2.37213	0.166619	2.53875
33.5	2.39341	0.257044	2.65045
34.5	2.53628	0.245619	2.7819
35.5	2.82775	0.171282	2.99904
36.5	2.24805	0.157677	2.40573
37.5	2.22029	0.18475	2.40504
38.5	2.45413	0.173317	2.62745
39.5	2.62537	0.247822	2.87319
40.5	2.5369	0.171748	2.70865
41.5	2.35528	0.205805	2.56108
42.5	2.42138	0.158291	2.57967
43.5	2.59505	0.202228	2.79728
44.5	2.52601	0.192568	2.71858
45.5	2.51562	0.197988	2.71361
46.5	3.11405	0.205781	3.31983
47.5	2.54808	0.170996	2.71907
48.5	2.94719	0.242268	3.18946
49.5	2.61573	0.173149	2.78888
50.5	3.11406	0.20579	3.31985
51.5	3.14309	0.166519	3.30961
52.5	3.23587	0.181285	3.41716
53.5	2.65111	0.200135	2.85125
54.5	3.20175	0.184361	3.38611
55.5	2.64267	0.214872	2.85754
56.5	2.62814	0.265552	2.8937
57.5	3.0652	0.219164	3.28436
58.5	3.1664	0.1644	3.3308
59.5	2.71646	0.183302	2.89976
60.5	3.15757	0.181163	3.33873
61.5	3.03952	0.265188	3.30471
62.5	3.10958	0.276337	3.38592
63.5	2.8331	0.16892	3.00202
64.5	2.54631	0.253911	2.80022
65.5	2.91133	0.21215	3.12348
66.5	3.15791	0.184956	3.34287
67.5	2.73293	0.291284	3.02421
68.5	2.73999	0.179807	2.91979
69.5	2.97835	0.179346	3.15769
70.5	3.05946	0.220105	3.27957
71.5	2.73063	0.246968	2.9776
72.5	3.05778	0.1804	3.23818
73.5	3.08495	0.182097	3.26705
74.5	3.02515	0.176359	3.20151
75.5	3.14818	0.28367	3.43185
76.5	3.07946	0.183277	3.26274
77.5	3.05716	0.174625	3.23178
78.5	3.06738	0.183277	3.25065
79.5	3.15621	0.18596	3.34217
80.5	2.73995	0.1722	2.91215
81.5	2.81728	0.179853	2.99713
82.5	2.68289	0.179431	2.86232
83.5	2.7803	0.175286	2.95559
84.5	2.7954	0.182768	2.97817
85.5	2.73123	0.174092	2.90532
86.5	2.84859	0.183133	3.03172
87.5	3.53894	0.207752	3.74669
88.5	3.10338	0.180886	3.28426
89.5	2.63928	0.172945	2.81223
90.5	2.91379	0.156617	3.07041
91.5	2.86876	0.234555	3.10332
92.5	3.06765	0.176737	3.24438
93.5	2.99592	0.207355	3.20328
94.5	2.98031	0.176081	3.15639
95.5	2.89311	0.181891	3.075
96.5	3.02921	0.185607	3.21482
97.5	3.04902	0.180777	3.22979
98.5	3.03459	0.17364	3.20823
99.5	3.14029	0.182052	3.32235
100.5	2.84327	0.161585	3.00485
101.5	2.94551	0.168348	3.11385
102.5	3.03253	0.173229	3.20576
103.5	3.05724	0.176648	3.23389
104.5	2.8819	0.228448	3.11035
105.5	3.00635	0.227641	3.23399
106.5	2.94956	0.168222	3.11779
107.5	3.15762	0.215095	3.37272
108.5	3.11368	0.233441	3.34712
109.5	3.05567	0.234159	3.28983
110.5	3.14176	0.207769	3.34953
111.5	3.23867	0.224977	3.46365
112.5	3.13901	0.174342	3.31335
113.5	3.0469	0.221429	3.26833
114.5	3.03294	0.250996	3.28394
115.5	3.12004	0.178097	3.29814
116.5	3.26472	0.177791	3.44251
117.5	3.08561	0.178578	3.26419
118.5	3.09068	0.225543	3.31622
119.5	2.9238	0.172768	3.09657
120.5	3.07972	0.180922	3.26064
121.5	2.92645	0.207098	3.13354
122.5	2.57713	0.207394	2.78453
123.5	2.89711	0.224418	3.12152
124.5	2.61099	0.20427	2.81526
125.5	3.22736	0.182847	3.41021
126.5	2.80066	0.309501	3.11016
127.5	3.08301	0.215195	3.29821
128.5	2.9924	0.179042	3.17145
129.5	3.22588	0.186435	3.41232
130.5	2.75023	0.173556	2.92378
131.5	2.66631	0.17823	2.84454
132.5	3.14971	0.178122	3.32783
133.5	3.0561	0.193347	3.24944
134.5	3.24038	0.187554	3.42794
135.5	3.00155	0.166276	3.16783
136.5	3.25751	0.192114	3.44962
137.5	3.07895	0.177981	3.25693
138.5	3.04574	0.179523	3.22527
139.5	3.27136	0.172642	3.444
140.5	3.2426	0.281965	3.52456
141.5	3.36396	0.186607	3.55057
142.5	3.09921	0.169118	3.26833
143.5	2.77626	0.168071	2.94433
144.5	2.92501	0.17499	3.1
145.5	2.89095	0.179839	3.07079
146.5	3.11726	0.172642	3.2899
147.5	3.32141	0.21812	3.53953
148.5	3.1185	0.16782	3.28632
149.5	3.28222	0.175081	3.4573
150.5	3.27302	0.170979	3.444
151.5	3.22263	0.16456	3.38719
152.5	3.26929	0.174295	3.44358
153.5	2.92292	0.164465	3.08739
154.5	3.15224	0.178326	3.33056
155.5	3.36162	0.177458	3.53908
156.5	3.23736	0.17079	3.40815
157.5	2.84175	0.16637	3.00812
158.5	3.2286	0.172403	3.401
159.5	2.8611	0.165634	3.02674
160.5	3.54676	0.193483	3.74024
161.5	2.71414	0.167591	2.88173
162.5	2.75311	0.167817	2.92093
163.5	2.95562	0.172392	3.12801
164.5	2.8587	0.177172	3.03587
165.5	2.91755	0.16963	3.08718
166.5	2.7552	0.165585	2.92079
167.5	3.02307	0.168041	3.19111
168.5	2.82024	0.170672	2.99091
169.5	2.97503	0.186855	3.16189
170.5	2.69906	0.16005	2.85911
171.5	3.28941	0.177795	3.46721
172.5	2.91395	0.169737	3.08369
173.5	3.26385	0.181472	3.44532
174.5	3.30481	0.185446	3.49026
175.5	3.24622	0.221861	3.46808
176.5	2.85839	0.17019	3.02858
177.5	2.67841	0.164329	2.84274
178.5	2.82355	0.216455	3.04001
179.5	2.85156	0.173876	3.02544
180.5	2.65148	0.17695	2.82843
181.5	3.21201	0.188144	3.40015
182.5	3.11148	0.17893	3.29041
183.5	3.03812	0.184024	3.22214
184.5	2.74845	0.177687	2.92613
185.5	3.113	0.183144	3.29614
186.5	3.17627	0.18058	3.35685
187.5	3.05134	0.177589	3.22893
188.5	2.76122	0.171555	2.93277
189.5	2.78044	0.171793	2.95223
190.5	3.17641	0.17649	3.3529
191.5	3.19467	0.170819	3.36549
192.5	2.98598	0.17967	3.16565
193.5	3.49722	0.203649	3.70087
194.5	3.2975	0.194039	3.49154
195.5	3.19586	0.190303	3.38616
196.5	3.25365	0.200056	3.45371
197.5	3.1624	0.1908	3.3532
198.5	3.07304	0.191784	3.26482
199.5	2.64688	0.178874	2.82576
200.5	3.30554	0.192368	3.49791
201.5	2.94	0.1968	3.1368
202.5	2.89361	0.193776	3.08739
203.5	2.99182	0.19739	3.18921
204.5	3.01753	0.198765	3.2163
205.5	3.17929	0.19015	3.36944
206.5	3.15826	0.18854	3.3468
207.5	3.12558	0.19464	3.32022
208.5	3.36577	0.208769	3.57454
209.5	2.88129	0.188739	3.07002
210.5	2.88393	0.179163	3.06309
211.5	2.9793	0.190678	3.16997
212.5	2.95578	0.187777	3.14356
213.5	2.82032	0.178253	2.99858
214.5	3.22238	0.183604	3.40599
215.5	3.13083	0.182536	3.31337
216.5	2.84357	0.177615	3.02119
217.5	3.3005	0.1886	3.4891
218.5	3.43345	0.195835	3.62928
219.5	3.32338	0.184611	3.50799
220.5	3.11188	0.190204	3.30209
221.5	3.35272	0.186151	3.53887
222.5	3.52238	0.190806	3.71319
223.5	3.48952	0.194368	3.68389
224.5	3.34306	0.18368	3.52674
225.5	2.75954	0.168058	2.9276
226.5	3.43309	0.198291	3.63138
227.5	3.15507	0.187464	3.34253
228.5	2.95009	0.173153	3.12325
229.5	2.94121	0.180567	3.12178
230.5	3.46034	0.197711	3.65805
231.5	3.27775	0.191589	3.46934
232.5	2.9607	0.18752	3.14822
233.5	3.22044	0.186097	3.40654
234.5	2.93185	0.184731	3.11658
235.5	2.81448	0.176166	2.99064
236.5	2.97672	0.175601	3.15232
237.5	3.44672	0.189517	3.63624
238.5	2.89091	0.176681	3.06759
239.5	3.36034	0.180078	3.54042
240.5	3.40648	0.188332	3.59482
241.5	3.33214	0.190072	3.52222
242.5	3.35347	0.187609	3.54108
243.5	3.29246	0.18201	3.47447
244.5	3.30905	0.181323	3.49038
245.5	3.40497	0.182149	3.58712
246.5	3.41216	0.185653	3.59781
247.5	2.92819	0.169825	3.09802
248.5	3.34984	0.190473	3.54031
249.5	3.32075	0.181989	3.50273
250.5	2.96771	0.179211	3.14692
251.5	3.2912	0.18271	3.47391
252.5	3.22195	0.180508	3.40246
253.5	3.24851	0.236255	3.48476
254.5	3.25502	0.181472	3.43649
255.5	3.15925	0.175264	3.33451
256.5	3.21319	0.180055	3.39325
257.5	2.84892	0.176684	3.02561
259.5	3.28594	0.185907	3.47184
261.5	3.2652	0.186	3.4512
263.5	3.24675	0.186994	3.43374
265.5	3.17359	0.183451	3.35704
267.5	3.11847	0.181242	3.29971
269.5	2.85503	0.179687	3.03471
271.5	2.89686	0.170684	3.06754
273.5	3.14509	0.168951	3.31404
275.5	3.29912	0.185544	3.48467
277.5	3.02889	0.173988	3.20288
279.5	3.06736	0.168662	3.23602
281.5	2.9592	0.175091	3.13429
283.5	3.07413	0.180624	3.25476
285.5	2.93448	0.172593	3.10707
287.5	3.0899	0.174221	3.26412
289.5	3.10645	0.172401	3.27885
291.5	2.66359	0.166118	2.82971
293.5	3.09297	0.176137	3.26911
295.5	3.26631	0.189082	3.4554
297.5	2.8124	0.168319	2.98071
299.5	2.89262	0.175401	3.06802
301.5	3.11806	0.181031	3.2991
303.5	3.14502	0.173251	3.31827
305.5	3.18807	0.183853	3.37193
307.5	3.20155	0.188478	3.39003
309.5	3.03636	0.199389	3.23575
311.5	3.04018	0.172604	3.21278
313.5	3.05313	0.16361	3.21674
315.5	3.23092	0.180872	3.41179
317.5	3.1599	0.170461	3.33036
319.5	3.07037	0.170294	3.24066
321.5	2.89839	0.177001	3.07539
323.5	3.08476	0.166343	3.2511
325.5	2.90941	0.169201	3.07861
327.5	3.1307	0.158954	3.28965
329.5	2.93941	0.163301	3.10271
331.5	2.6045	0.167103	2.7716
333.5	3.04028	0.17412	3.2144
335.5	3.1163	0.170739	3.28704
337.5	3.12644	0.173852	3.30029
339.5	2.99426	0.163386	3.15764
341.5	2.97986	0.167468	3.14733
